# Supplementary material for: Production of Pumilarin and a Novel Circular Bacteriocin, Altitudin A, by Bacillus altitudinis ECC22, a Soil-Derived Bacteriocin Producer
Source: MDPI journal article supplement (doi:10.3390/ijms25042020), 2024-02-07
Supplement: s1 [file s1]

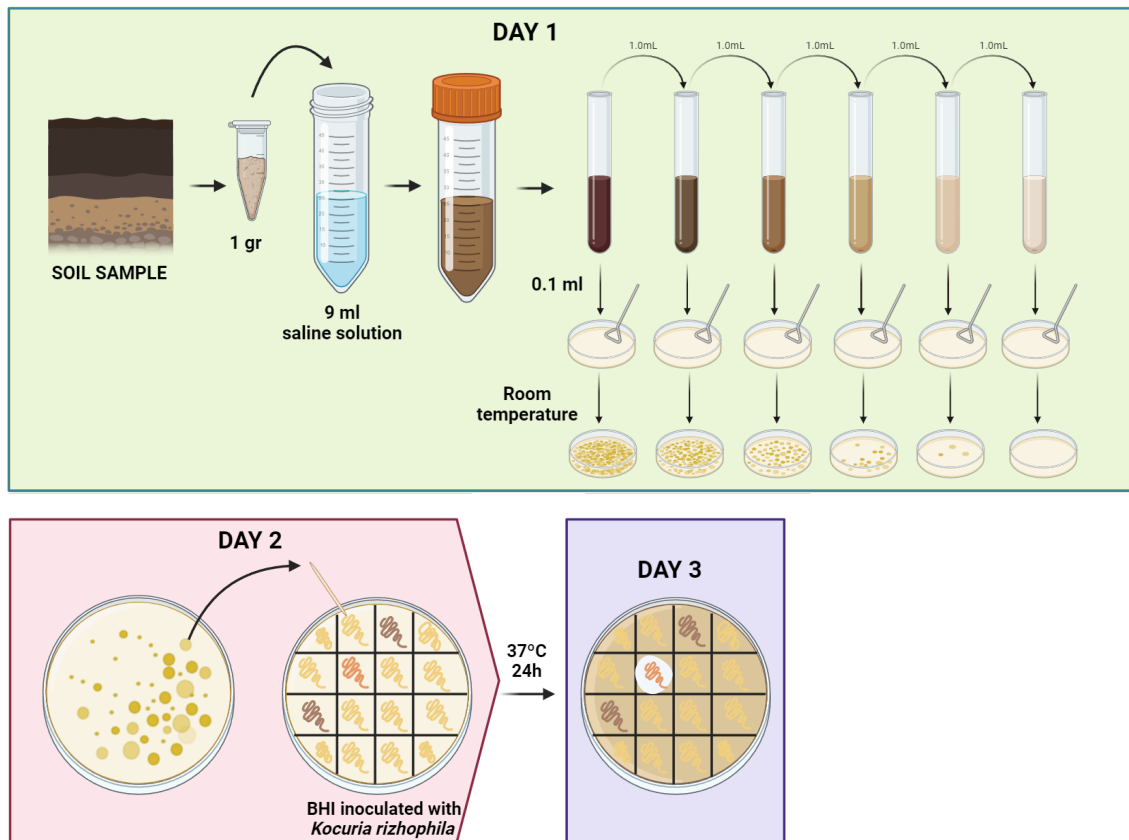

**Figure S1.** Schematic view of the screening workflow carried out by students from the CEIPSO El Cantizal.

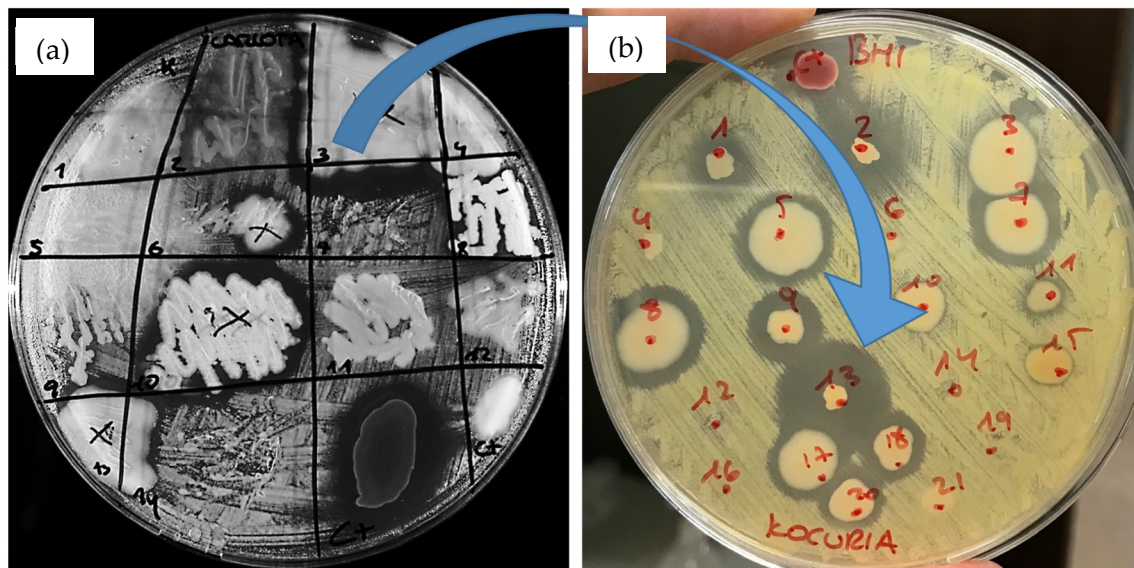

**Figure S2.** Direct antimicrobial activity of soil-derived bacterial isolates. (a) A number of colonies isolated from soil were tested against the gram positive indicator *Kocuria rhizophila* CECT 24, by students from the CEIPSO El Cantizal. Colony 3 was selected for its large antimicrobial activity. (b) Confirmation of the antimicrobial activity of the most active isolates against *Kocuria rhizophila* CECT 241. Colony 13, corresponding to colony 3 in plate (a), was selected for its large antimicrobial activity.

**Table S1.** Assembly quality assessment of *B. altitudinis* ECC22 genome using Quast.

| Assembly                        |         |
|---------------------------------|---------|
| # contigs ( $\geq 0$ bp)        | 1       |
| # contigs ( $\geq 1000$ bp)     | 1       |
| # contigs ( $\geq 5000$ bp)     | 1       |
| # contigs ( $\geq 10000$ bp)    | 1       |
| # contigs ( $\geq 25000$ bp)    | 1       |
| # contigs ( $\geq 50000$ bp)    | 1       |
| Total length ( $\geq 0$ bp)     | 3807059 |
| Total length ( $\geq 1000$ bp)  | 3807059 |
| Total length ( $\geq 5000$ bp)  | 3807059 |
| Total length ( $\geq 10000$ bp) | 3807059 |
| Total length ( $\geq 25000$ bp) | 3807059 |
| Total length ( $\geq 50000$ bp) | 3807059 |
| # contigs                       | 1       |
| Largest contig                  | 3807059 |
| Total length                    | 3807059 |
| GC (%)                          | 41.29   |
| N50                             | 3807059 |
| N75                             | 3807059 |
| L50                             | 1       |
| L75                             | 1       |
| # N's per 100 kbp               | 0.00    |

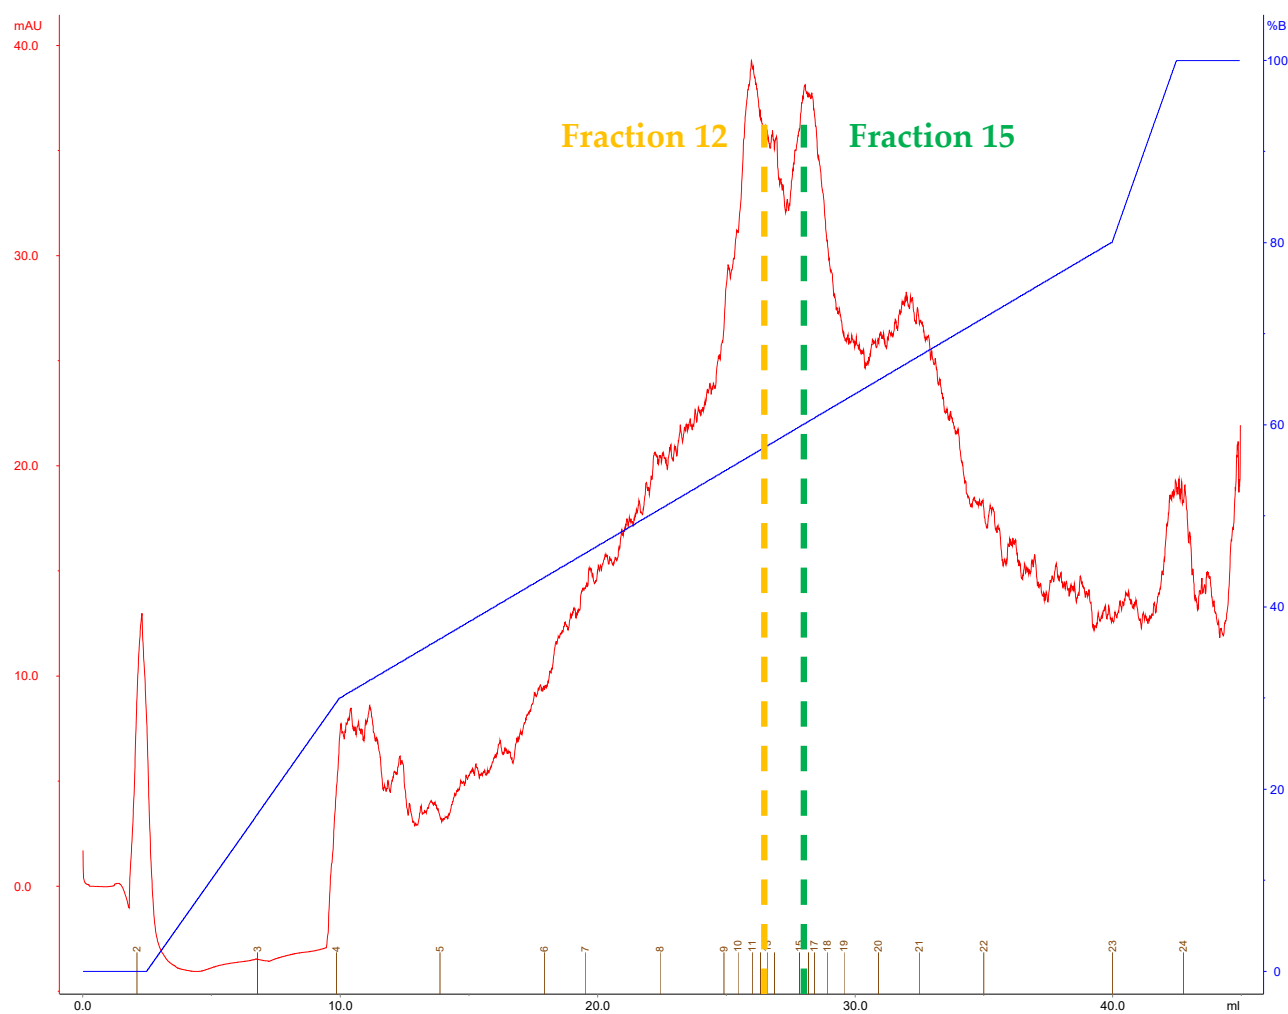

**Figure S3.** Elution profile after the second RP-FPLC round of purification of the CFS of *B. altitudinis* ECC22. Only the eluted fractions 12 (in yellow) and 15 (in green), showed antimicrobial activity against *P. damnosus* CECT 4797.
